# Supplementary material for: PriME-PGx: La Princesa University Hospital Multidisciplinary Initiative for the Implementation of Pharmacogenetics
Source: MDPI journal article supplement (doi:10.3390/jcm10173772), 2021-08-24
Supplement: s1 [file s1]

# Supplementary Material

**Supplementary Table S1.** Actionable pharmacogenetic tests included in the seven pharmacogenetic profiles and the complete pharmacogenetic report offered at Clinical Pharmacology Department, Hospital Universitario de La Princesa.

| Pain Management Profile                                                                  | Complete pharmacogenetic report                                                          |
|------------------------------------------------------------------------------------------|------------------------------------------------------------------------------------------|
| CYP2D6                                                                                   | CYP2D6                                                                                   |
| Tramadol                                                                                 | Tramadol                                                                                 |
| Codeine                                                                                  | Codeine                                                                                  |
| SSRIs (fluvoxamine, paroxetine)                                                          | SSRIs (fluvoxamine, paroxetine)                                                          |
| TCAs (desipramine, nortriptiline)                                                        | TCAs (desipramine, nortriptiline)                                                        |
| CYP2C19                                                                                  | Tropisetron, ondansetron                                                                 |
| PPIs (omeprazole, pantoprazole, lansoprazole, dexlansoprazole)                           | Tamoxifen                                                                                |
| SSRIs (citalopram, escitalopram, sertraline)                                             | Antipsychotics (aripiprazole, haloperidol, risperidone)                                  |
| TCAs (clomipramine, doxepine, imipramine, trimipramine, amitriptiline, nortriptiline)    | CYP2C19                                                                                  |
| CYP2C9                                                                                   | PPIs (omeprazole, pantoprazole, lansoprazole, dexlansoprazole)                           |
| NSAIDs (celecoxib, flurbiprofen, lornoxicam, ibuprofen, meloxicam, piroxicam, tenoxicam) | SSRIs (citalopram, escitalopram, sertraline)                                             |
| SLCO1B1                                                                                  | TCAs (clomipramine, doxepine, imipramine, trimipramine, amitriptiline, nortriptiline)    |
| Atorvastatin, simvastatin                                                                | Voriconazole                                                                             |
| HLA-B*15 y A*31                                                                          | Clopidogrel                                                                              |
| Carbamazepine                                                                            | CYP2C9                                                                                   |
|                                                                                          | NSAIDs (celecoxib, flurbiprofen, lornoxicam, ibuprofen, meloxicam, piroxicam, tenoxicam) |
| Oncology profile.                                                                        | Siponimod                                                                                |
| CYP2D6                                                                                   | CYP2C9+HLA-B                                                                             |
| Tramadol                                                                                 | Phenytoin                                                                                |
| Codeine                                                                                  | SLCO1B1                                                                                  |
| Tropisetron, ondansetron                                                                 | Atorvastatin, simvastatin                                                                |
| Tamoxifen                                                                                | HLA-B*15 y A*31                                                                          |
| DPYD                                                                                     | Carbamazepine                                                                            |
| 5-fluorouracil, capecitabine, tegafur                                                    | TPMT and NUDT15                                                                          |
| TPMT and NUDT15                                                                          | Azathioprine and mercaptopurine                                                          |
| Azathioprine and mercaptopurine                                                          | CYP3A5                                                                                   |
| CYP3A5                                                                                   | Tacrolimus                                                                               |
| Tacrolimus                                                                               | UGT1A1                                                                                   |
| UGT1A1                                                                                   | Irinotecan                                                                               |
| Irinotecan                                                                               | Atazanavir                                                                               |
|                                                                                          | DPYD                                                                                     |
| Department of Neuropsychiatry                                                            | Flucytosine                                                                              |
| CYP2D6                                                                                   | HLA-B*57:01                                                                              |
| Antipsychotics (aripiprazole, haloperidol, risperidone)                                  | Abacavir                                                                                 |
| SSRIs (fluvoxamine, paroxetine)                                                          | IFNL3                                                                                    |
| TCAs (desipramine, nortriptiline)                                                        | Ribavirin, peg- $\alpha$ -2a/2b interferon                                               |
| CYP2C19                                                                                  | UGT1A1                                                                                   |
| SSRIs (citalopram, escitalopram, setrtraline)                                            | CYP2B6                                                                                   |

|                                                                                       |
|---------------------------------------------------------------------------------------|
| TCAs (clomipramine, doxepine, imipramine, trimipramine, amitriptiline, nortriptiline) |
| <b>CYP2C9</b>                                                                         |
| Siponimod                                                                             |
| <b>CYP2C9+HLA-B</b>                                                                   |
| Phenytoin                                                                             |
| <b>HLA-B*15 y A*31</b>                                                                |
| Carbamazepine                                                                         |
| <b>Immunosuppressants profile.</b>                                                    |
| <b>CYP3A5</b>                                                                         |
| Tacrolimus                                                                            |
| <b>TPMT and NUDT15</b>                                                                |
| Azathioprine and mercaptopurine                                                       |
| <b>Infectious Diseases profile.</b>                                                   |
| <b>DPYD</b>                                                                           |
| Flucytosine                                                                           |
| <b>HLA-B*57:01</b>                                                                    |
| Abacavir                                                                              |
| <b>IFNL3</b>                                                                          |
| Ribavirin, peg- $\alpha$ -2a/2b interferon                                            |
| <b>UGT1A1</b>                                                                         |
| Atazanavir                                                                            |
| <b>CYP2B6</b>                                                                         |
| Efavirenz                                                                             |
| <b>CYP2C19</b>                                                                        |
| Voriconazole                                                                          |
| <b>Gastroenterology profile.</b>                                                      |
| <b>CYP2C19</b>                                                                        |
| PPIs (omeprazole, pantoprazole, lansoprazole, dexlansoprazole)                        |
| Clopidogrel                                                                           |
| <b>TPMT and NUDT15</b>                                                                |
| Azathioprine and mercaptopurine                                                       |
| <b>CYP2C9, CYP4F2 and VKORC1</b>                                                      |
| Warfarin, acenocumarol                                                                |
| <b>Cardiovascular medicine profile.</b>                                               |
| <b>CYP2C19</b>                                                                        |
| PPIs (omeprazole, pantoprazole, lansoprazole, dexlansoprazole)                        |
| Clopidogrel                                                                           |
| <b>SLCO1B1</b>                                                                        |
| Atorvastatin, simvastatin                                                             |
| <b>CYP2C9, CYP4F2 and VKORC1</b>                                                      |
| Warfarin, acenocumarol                                                                |

|                                  |
|----------------------------------|
| Efavirenz                        |
| <b>CYP2C19</b>                   |
| Voriconazole                     |
| <b>CYP2C9, CYP4F2 and VKORC1</b> |
| Warfarin, acenocumarol           |

## Supplementary File 1. Complete report.

### COMPLETE REPORT

*Example*

|                      |                |              |                |
|----------------------|----------------|--------------|----------------|
| PATIENT:             | <i>Example</i> | PATIENT ID   | <i>Example</i> |
| REQUESTING PHYSICIAN | <i>Example</i> | DEPARTMENT   | <i>Example</i> |
| DATE OF REQUEST      | <i>Example</i> | REPORT DATE: | <i>Example</i> |

### GENES AND VARIANTS

| Gene    | Allele                        | Genotype | Phenotype                          | Gene  | Allele                | Genotype | Phenotype                |
|---------|-------------------------------|----------|------------------------------------|-------|-----------------------|----------|--------------------------|
| CYP2B6  | *1, *4...                     | *1/*6    | Intermediate metabolizer           | COMT  | rs13306278, rs4680    | WT/MUT   | Intermediate metabolizer |
| CYP2C19 | *1, *2, *17...                | *2/*17   | Intermediate metabolizer           | COMT  | rs4680, rs13306278    | WT/MUT   | Intermediate metabolizer |
| CYP2C9  | *1, *2, *3...                 | *1/*11   | Intermediate metabolizer (AS: 1.0) | HCP5  | rs2395029             | T/T      | Normal metabolizer       |
| CYP2D6  | *1, *3, *4, ...               | *1/*2    | Normal metabolizer                 | HLA   | rs1061235             | WT/WT    | Non-carrier              |
| CYP3A5  | *1, *3, *6                    | *3/*3    | Poor metabolizer                   | IL28B | rs12979860, rs8099917 | C/C      | Favourable response      |
| SLCO1B1 | *1, *2, *3, *5...             |          | Decreased function                 |       |                       |          |                          |
| CYP4F2  | *1, *3                        | *1/*1    | Normal metabolizer                 |       |                       |          |                          |
| DPYD    | *2, *13, rs67376798, HapB3... | *1/*1    | Normal metabolizer                 |       |                       |          |                          |
| NUDT15  | *1, *3                        | *1/*1    | Normal metabolizer                 |       |                       |          |                          |
| TPMT    | *1, *2, *3B, *3C, *4          | *1/*1    | Normal metabolizer                 |       |                       |          |                          |
| UGT1A1  | *6, *80                       | *80/*80  | Poor metabolizer                   |       |                       |          |                          |

For more information, please refer to the Annex, which contains clinical recommendations based on Clinical Pharmacogenetics Implementation Consortium<sup>1</sup> and the Dutch Pharmacogenetics Working Group (DPWG)<sup>2</sup> with the most up to date information at this time.

**NOTE:** should you have any problems with the interpretation of these results, please contact the Clinical Pharmacology Department of Hospital Universitario de la Princesa: +34915202425 or [fcl.hlpr@salud.madrid.org](mailto:fcl.hlpr@salud.madrid.org).

## Supplementary File 1. Complete report.

### ANNEX

| Gene    | Phenotype                          | Drugs involved                                          | Clinical recommendation                                                                        |
|---------|------------------------------------|---------------------------------------------------------|------------------------------------------------------------------------------------------------|
| CYP2B6  | Intermediate metabolizer           | EFAVIRENZ                                               | Clinical recommendations based on CPIC and DPWG pharmacogenetic guidelines written in Spanish. |
| CYP2C19 | Intermediate metabolizer           | SERTRALINE, ESCITALOPRAM, CITALOPRAM                    | Clinical recommendations based on CPIC and DPWG pharmacogenetic guidelines written in Spanish. |
| CYP2C9  | Intermediate metabolizer (AS: 1.0) | CITALOPRAM, ESCITALOPRAM, SERTRALINE                    | Clinical recommendations based on CPIC and DPWG pharmacogenetic guidelines written in Spanish. |
| CYP2C9  | Intermediate metabolizer (AS: 1.0) | OMEPRazole, LANSOPRAZOLE, PANTOPRAZOLE, DEXLANSOPRAZOLE | Clinical recommendations based on CPIC and DPWG pharmacogenetic guidelines written in Spanish. |
| CYP2C9  | Intermediate metabolizer (AS: 1.0) | CELECOXIB, FLURBIPROFEN, IBUPROFEN, LORNOXICAM          | Clinical recommendations based on CPIC and DPWG pharmacogenetic guidelines written in Spanish. |
| CYP2C9  | Intermediate metabolizer (AS: 1.0) | CLOPIDOGREL                                             | Clinical recommendations based on CPIC and DPWG pharmacogenetic guidelines written in Spanish. |
| CYP2C9  | Intermediate metabolizer (AS: 1.0) | MELOXICAM                                               | Clinical recommendations based on CPIC and DPWG pharmacogenetic guidelines written in Spanish. |
| CYP2C9  | Intermediate metabolizer (AS: 1.0) | PIROXICAM, TENOXICAM                                    | Clinical recommendations based on CPIC and DPWG pharmacogenetic guidelines written in Spanish. |
| CYP2C9  | Intermediate metabolizer (AS: 1.0) | VORICONAZOLE                                            | Clinical recommendations based on CPIC and DPWG pharmacogenetic guidelines written in Spanish. |
| CYP2D6  | Normal metabolizer                 | FLUVOXAMINE                                             | Clinical recommendations based on CPIC and DPWG pharmacogenetic guidelines written in Spanish. |
| CYP2D6  | Normal metabolizer                 | CODEINE                                                 | Clinical recommendations based on CPIC and DPWG pharmacogenetic guidelines written in Spanish. |
| CYP2D6  | Normal metabolizer                 | PROPAFENONE                                             | Clinical recommendations based on CPIC and DPWG pharmacogenetic guidelines written in Spanish. |
| CYP2D6  | Normal metabolizer                 | HALOPERIDOL                                             | Clinical recommendations based on CPIC and DPWG pharmacogenetic guidelines written in Spanish. |
| CYP2D6  | Normal metabolizer                 | ATOMOXTINE                                              | Clinical recommendations based on CPIC and DPWG pharmacogenetic guidelines written in Spanish. |
| CYP2D6  | Normal metabolizer                 | TAMOXIFEN                                               | Clinical recommendations based on CPIC and DPWG pharmacogenetic guidelines written in Spanish. |
| CYP2D6  | Normal metabolizer                 | VENLAFAXINE                                             | Clinical recommendations based on CPIC and DPWG pharmacogenetic guidelines written in Spanish. |
| CYP2D6  | Normal metabolizer                 | TRICYCLIC ANTIDEPRESSANTS                               | Clinical recommendations based on CPIC and DPWG pharmacogenetic guidelines written in Spanish. |
| CYP2D6  | Normal metabolizer                 | PAROXETINE                                              | Clinical recommendations based on CPIC and DPWG pharmacogenetic guidelines written in Spanish. |
| CYP2D6  | Normal metabolizer                 | TROPISETRON, ONDASETRON                                 | Clinical recommendations based on CPIC and DPWG pharmacogenetic guidelines written in Spanish. |
| CYP2D6  | Normal metabolizer                 | METOPROLOL                                              | Clinical recommendations based on CPIC and DPWG pharmacogenetic guidelines written in Spanish. |
| CYP3A5  | Poor metabolizer                   | TACROLIMUS                                              | Clinical recommendations based on CPIC and DPWG pharmacogenetic guidelines written in Spanish. |
| CYP4F2  | Normal metabolizer                 | WARFARINE                                               | Clinical recommendations based on CPIC and DPWG pharmacogenetic guidelines written in Spanish. |
| DPYD    | Normal metabolizer                 | FLUOROPYRIMIDINES                                       | Clinical recommendations based on CPIC and DPWG pharmacogenetic guidelines written in Spanish. |
| DPYD    | Normal metabolizer                 | FLUOROPYRIMIDINES                                       | Clinical recommendations based on CPIC and DPWG pharmacogenetic guidelines written in Spanish. |
| UGT1A1  | Poor metabolizer                   | ATAZANAVIR                                              | Clinical recommendations based on CPIC and DPWG pharmacogenetic guidelines written in Spanish. |
| UGT1A1  | Poor metabolizer                   | ATAZANAVIR                                              | Clinical recommendations based on CPIC and DPWG pharmacogenetic guidelines written in Spanish. |
| UGT1A1  | Poor metabolizer                   | IRINOTECAN**                                            | Clinical recommendations based on CPIC and DPWG pharmacogenetic guidelines written in Spanish. |
| IL28B   | Favorable response                 | RIBAVIRIN PEG-IFN                                       | Clinical recommendations based on CPIC and DPWG pharmacogenetic guidelines written in Spanish. |

## Supplementary File 1. Complete report.

|                     |                                                     |                                    |                                                                                                |
|---------------------|-----------------------------------------------------|------------------------------------|------------------------------------------------------------------------------------------------|
| SLCO1B1             | Decreased function                                  | SIMVASTATIN                        | Clinical recommendations based on CPIC and DPWG pharmacogenetic guidelines written in Spanish. |
| SLCO1B1             | Decreased function                                  | ATORVASTATIN                       | Clinical recommendations based on CPIC and DPWG pharmacogenetic guidelines written in Spanish. |
| TPMT -<br>NUDT15    | Normal metabolizer -<br>Normal metabolizer          | AZATHIOPRINE, 6-<br>MERCAPTOPURINE | Clinical recommendations based on CPIC and DPWG pharmacogenetic guidelines written in Spanish. |
| CYP2C9 -<br>HLA     | Intermediate<br>metabolizer - Non-<br>carrier       | PHENYTOIN                          | Clinical recommendations based on CPIC and DPWG pharmacogenetic guidelines written in Spanish. |
| CYP2C19<br>- CYP2D6 | Intermediate<br>metabolizer - Normal<br>metabolizer | AMITRIPTYLYNE                      | Clinical recommendations based on CPIC and DPWG pharmacogenetic guidelines written in Spanish. |

## REFERENCES

1. Relling MV, Klein TE. CPIC: Clinical Pharmacogenetics Implementation Consortium of the Pharmacogenomics Research Network. Clinical Pharmacology & Therapeutics. marzo de 2011;89(3):464-7.
2. Royal Dutch Pharmacists Association - Pharmacogenetics Working Group, CYP2D6-Tramadol, disponible en: <https://www.g-standaard.nl/risicoanalyse/B0001590.PDF>.

## Supplementary file 2. Relevant findings report.

### RELEVANT FINDINGS REPORT

*Example*

|                      |                |              |                |
|----------------------|----------------|--------------|----------------|
| PATIENT:             | <i>Example</i> | PATIENT ID   | <i>Example</i> |
| REQUESTING PHYSICIAN | <i>Example</i> | DEPARTMENT   | <i>Example</i> |
| DATE OF REQUEST      | <i>Example</i> | REPORT DATE: | <i>Example</i> |

You have been genotyped for a panel of genes and variants that determine response to numerous drugs. The relevant pharmacogenetic findings are described below:

### GENES AND VARIANTS

| Gene    | Allele              | Genotype | Phenotype                          |
|---------|---------------------|----------|------------------------------------|
| CYP2B6  | *1, *4, *6, *9      | *1/*6    | Intermediate metabolizer           |
| CYP2C19 | *1, *2, *3, *4, *17 | *2/*17   | Intermediate metabolizer           |
| CYP2C9  | *1, *2, *3          | *1/*11   | Intermediate metabolizer (AS: 1.0) |
| CYP3A5  | *1, *3, *6          | *3/*3    | Poor metabolizer.                  |
| SLCO1B1 | rs4149056           | *1A/*15  | Decreased function                 |
| UGT1A1  | *80                 | *80/*80  | Poor metabolizer.                  |

**This document requires interpretation by qualified healthcare personnel.** Please give it to your practitioner. Should they have any problems with the interpretation of these results, please contact the Clinical Pharmacology Department of Hospital Universitario de la Princesa: +34915202425 or [fcl.hlpr@salud.madrid.org](mailto:fcl.hlpr@salud.madrid.org).
